# Supplementary material for: Regulation of ezrin tension by S-nitrosylation mediates non-small cell lung cancer invasion and metastasis
Source: PubMed Central journal article supplement — Theranostics. 2019 Apr 13;9(9):2555–71. doi: 10.7150/thno.32479 (PMC6525990; doi:10.7150/thno.32479), 2019-04-13
Supplement: thnov09p2555s1.pdf [file thnov09p2555s1.pdf]

Supplementary figures & tables:

Figure S1.

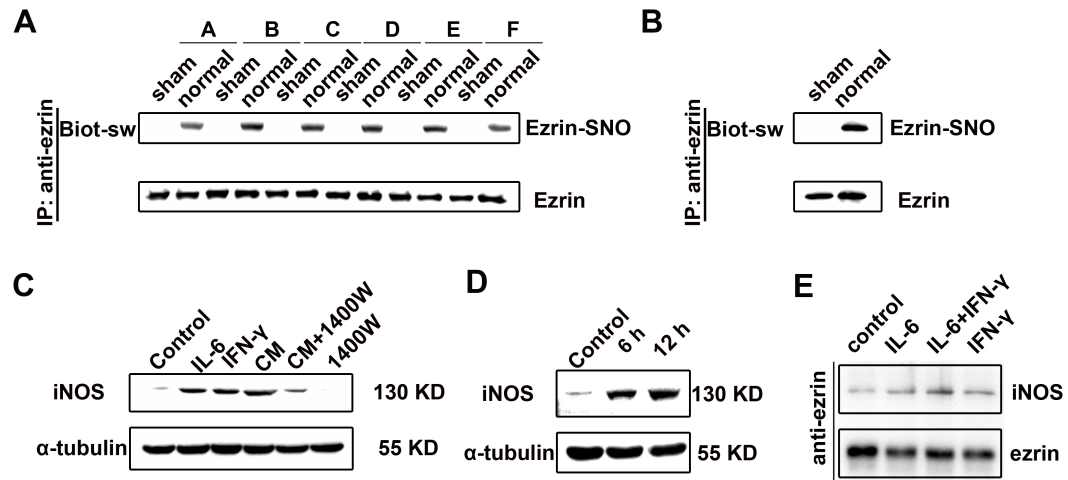

Figure S2.

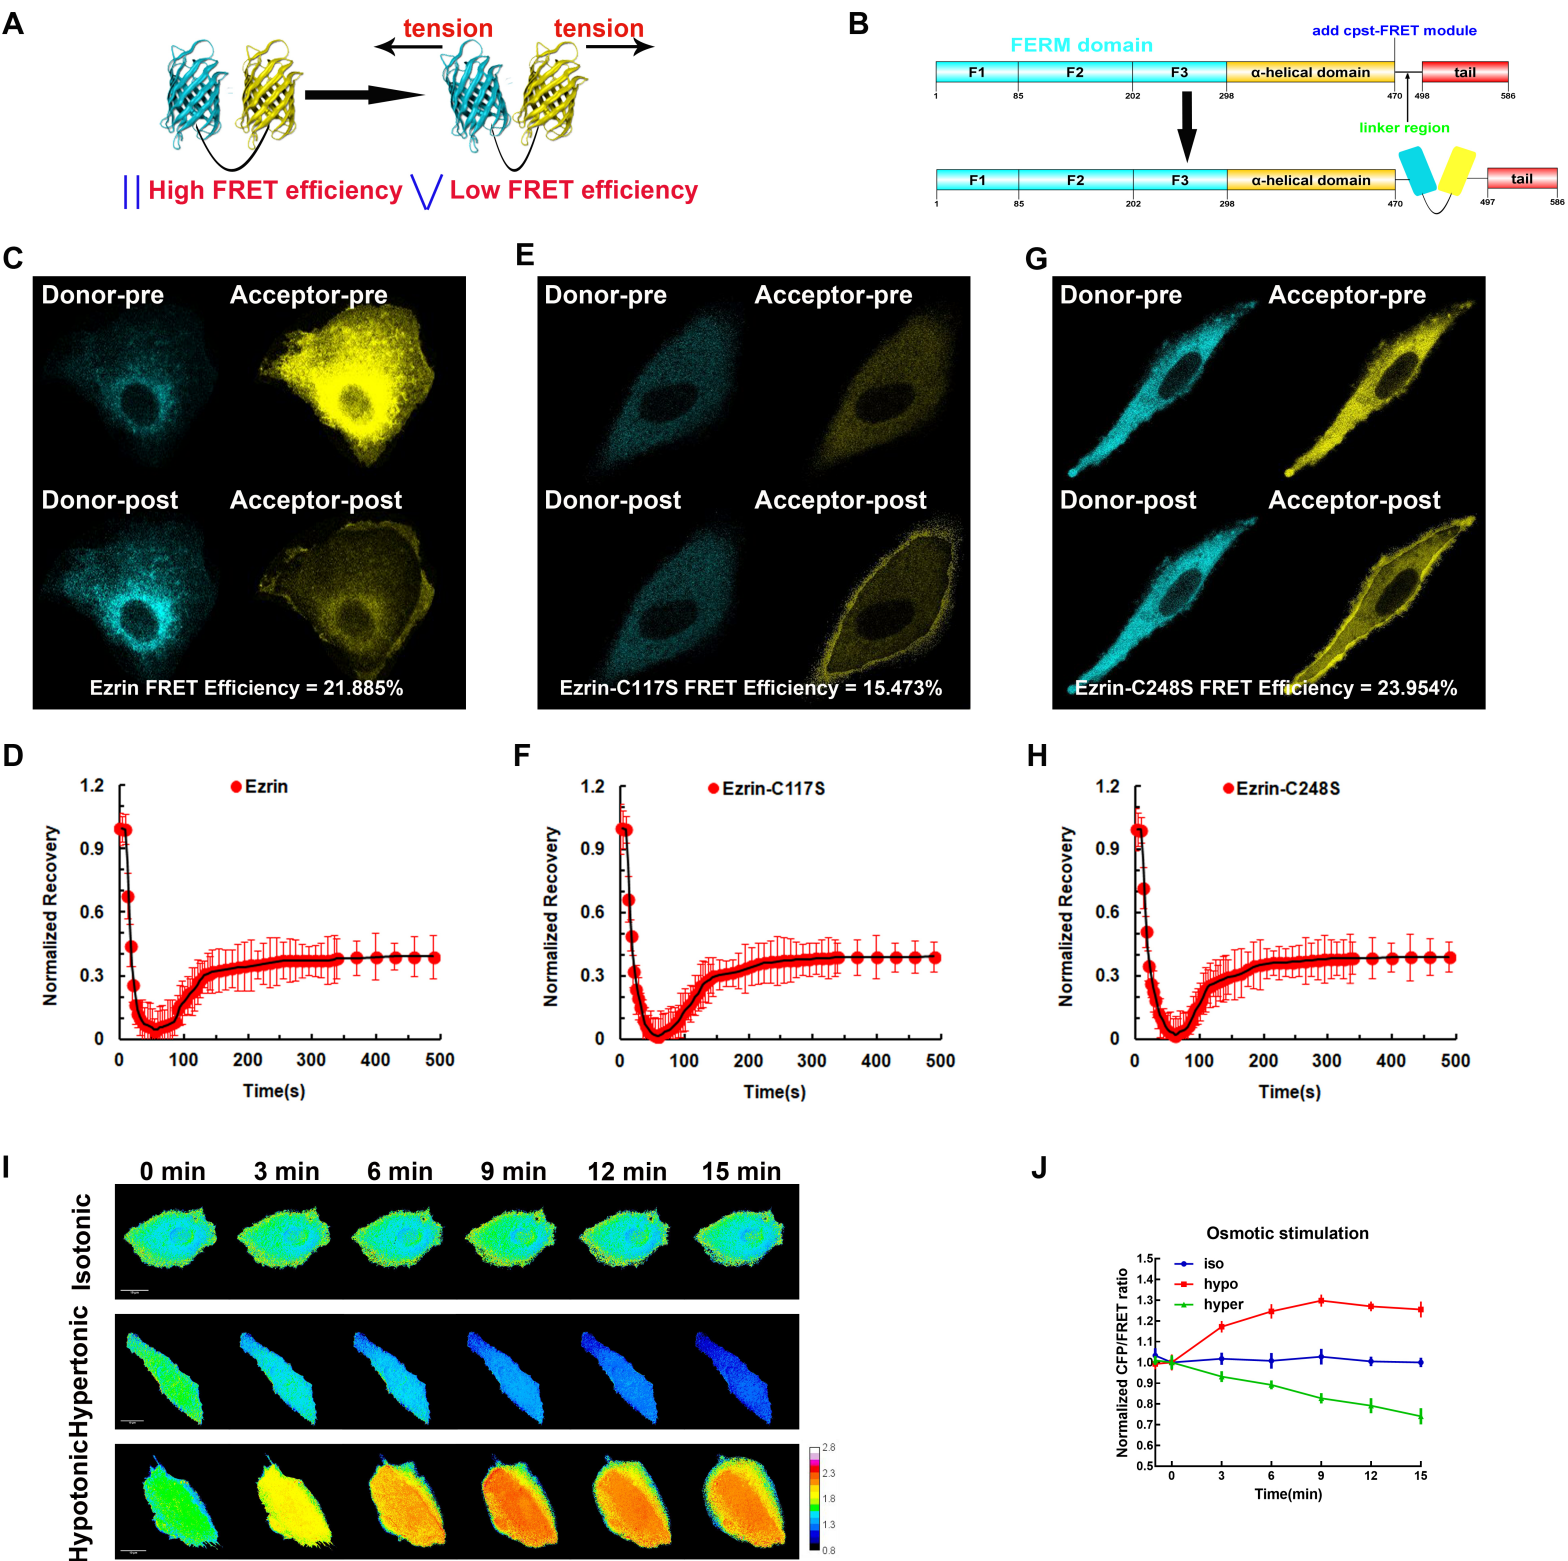

Figure S3.

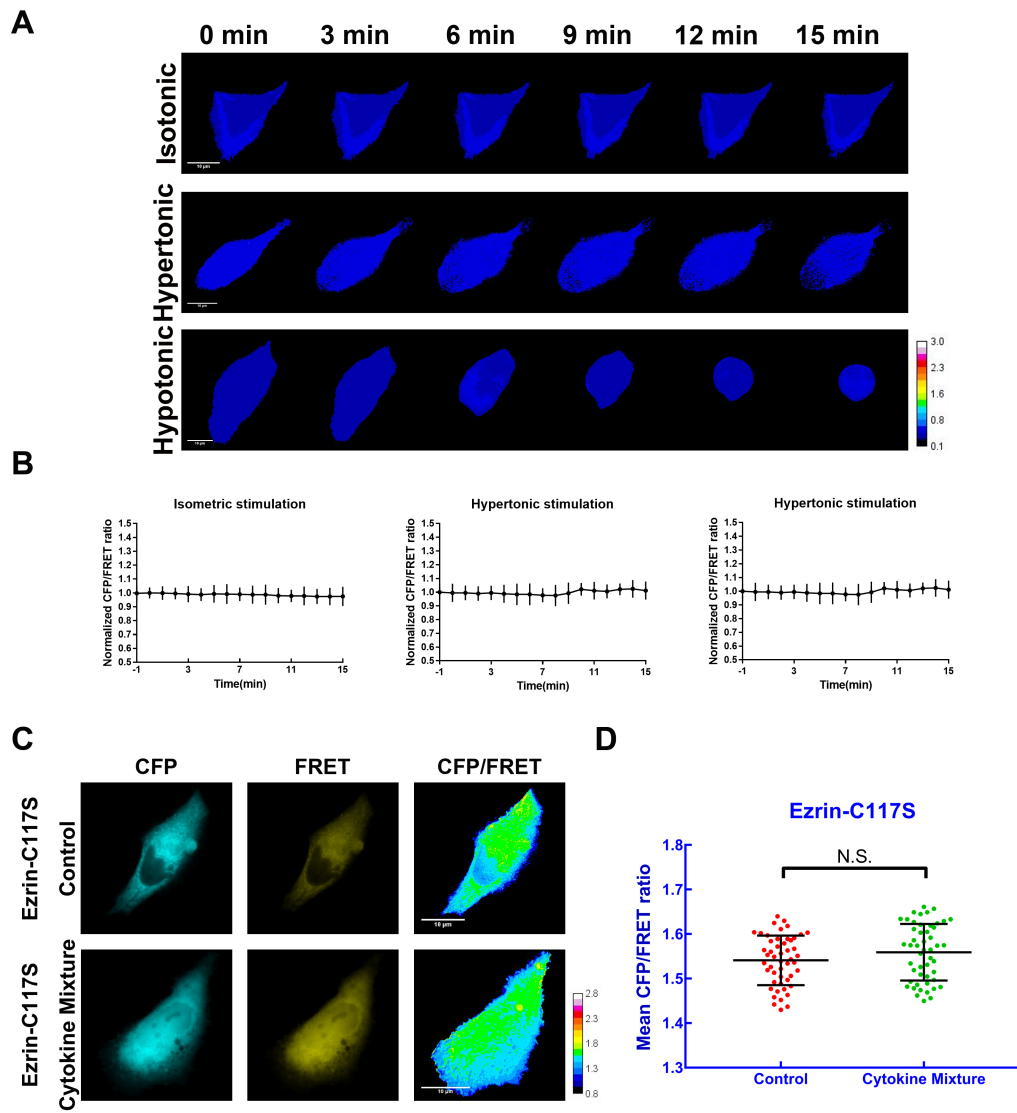

Figure S4.

A

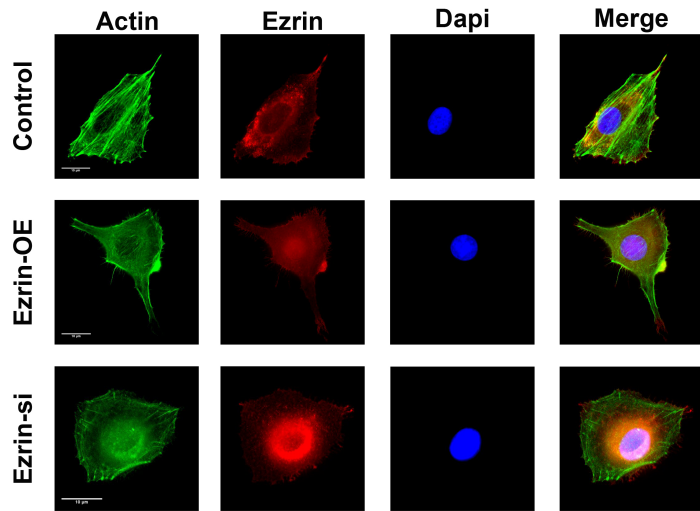

B

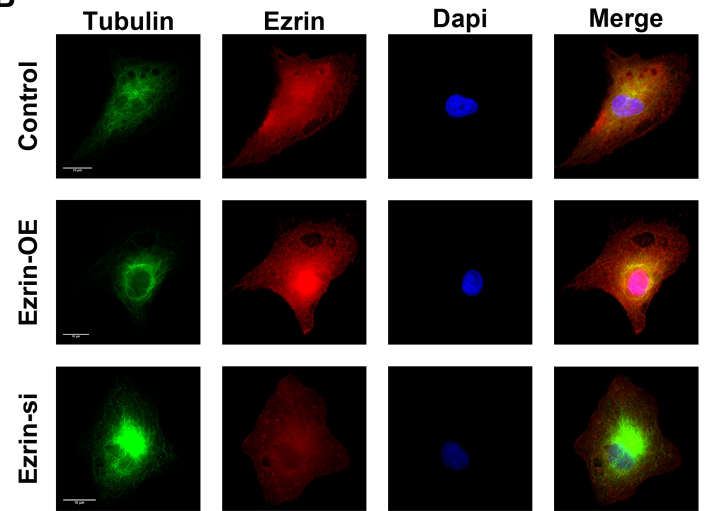

**Table S1: Pathological characteristics of lung cancer patients.**

| <b>Characteristics</b>    | <b>cases</b> |
|---------------------------|--------------|
| Total number              | 20           |
| <i>Gender</i>             |              |
| Male                      | 11           |
| Femal                     | 9            |
| <i>Age</i>                |              |
| > 60                      | 16           |
| ≤ 60                      | 4            |
| <i>Tumor size</i>         |              |
| ≥ 5 cm                    | 16           |
| < 5 cm                    | 4            |
| <i>Tumor stage</i>        |              |
| I-II                      | 5            |
| III                       | 15           |
| <i>Lymph node status</i>  |              |
| N <sub>0</sub>            | 3            |
| N <sub>1-3</sub>          | 17           |
| <i>Distant metastasis</i> |              |
| M <sub>0</sub>            | 2            |
| M <sub>1</sub>            | 18           |
| <i>Histology</i>          |              |
| Adenocarcinoma            | 15           |
| Squamous carcinoma        | 5            |

The description of pathological characteristics was based on the international system for staging lung cancer.

**Table S2: Introduction of motor proteins.**

| Motor Proteins | Inhibitor     | Mechnaism                                                                                                                                                                                                     | Effect                                                                                                                |
|----------------|---------------|---------------------------------------------------------------------------------------------------------------------------------------------------------------------------------------------------------------|-----------------------------------------------------------------------------------------------------------------------|
| dynein         | ciliobrevin D | Compete with ATP at its binding site in the dynein motor, thus increase the time for dynein attachment to the microtubule in the post-powerstroke conformation[1].                                            | Inhibit dynein to glide on microtubule and vesicular transportation [2].                                              |
| kynessin       | ispinesib     | Prevent the release of ADP without preventing the release of the kynessin-ADP complex from the microtubule [3] .                                                                                              | Alter the ability of kynessin to bind to microtubules and inhibits its movement [3].                                  |
| myosin         | Blebbistatin  | Bind preferentially to the ATPase intermediate with ADP and phosphate bound at the active site, and slow down phosphate release. Block the myosin heads in a products complex with low actin affinity [4, 5]. | Inhibit both myosin II contractility and actin-network treadmilling resulting in the decrease of retrograde flow [6]. |

**References:**

- 1 Kikkawa M: Big steps toward understanding dynein. *J Cell Biol.* 2013; 202:15-23.
- 2 Firestone AJ, Weinger JS, Maldonado M, Barlan K, Langston LD, O'Donnell M, Gelfand VI, Kapoor TM, Chen JK: Small-molecule inhibitors of the AAA+ ATPase motor cytoplasmic dynein. *Nature.* 2012; 484:125-129.
- 3 Lad L, Luo L, Carson JD, Wood KW, Hartman JJ, Copeland RA, Sakowicz R: Mechanism of inhibition of human KSP by ispinesib. *Biochemistry.* 2008; 47:3576-3585.
- 4 Kovacs M, Toth J, Hetenyi C, Malnasi-Csizmadia A, Sellers JR: Mechanism of blebbistatin inhibition of myosin II. *J Biol Chem.* 2004; 279:35557-35563.
- 5 Ramamurthy B, Yengo CM, Straight AF, Mitchison TJ, Sweeney HL: Kinetic mechanism of blebbistatin inhibition of nonmuscle myosin IIb. *Biochemistry.* 2004; 43:14832-14839.
- 6 Medeiros NA, Burnette DT, Forscher P: Myosin II functions in actin-bundle turnover in neuronal growth cones. *Nat Cell Biol.* 2006; 8:215-226.
